# Supplementary material for: Design, Synthesis and Biological Evaluation of N,N-Substituted Amine Derivatives as Cholesteryl Ester Transfer Protein Inhibitors
Source: MDPI journal article supplement (doi:10.3390/molecules22101658), 2017-10-03

**Design, synthesis and biological evaluation of *N,N*-substituted amine derivatives as cholesteryl ester transfer protein inhibitors**

**Xinran Wang <sup>1</sup>, Lijuan Hao <sup>1</sup>, Xuanqi Xu <sup>2</sup>, Wei Li <sup>1</sup>, Chunchi Liu <sup>1</sup>, Dongmei Zhao <sup>1,\*</sup> and Maosheng Cheng <sup>1</sup>**

<sup>1</sup> Key Laboratory of Structure-Based Drug Design & Discovery of Ministry of Education, Shenyang Pharmaceutical University, shenyang 110016, China; medchemzhao@163.com

<sup>2</sup> Department of Chemistry, University of Wisconsin- Madison, Madison, WI, USA; xxu53@wisc.edu

\* Correspondence: medchemzhao@163.com; Tel.: +86-24-43520219

**Content: <sup>1</sup>H NMR, <sup>13</sup>C NMR, HRMS for all target compounds reported in this study.**

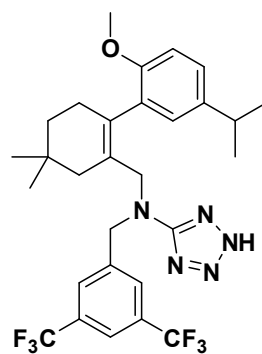

Compound 12

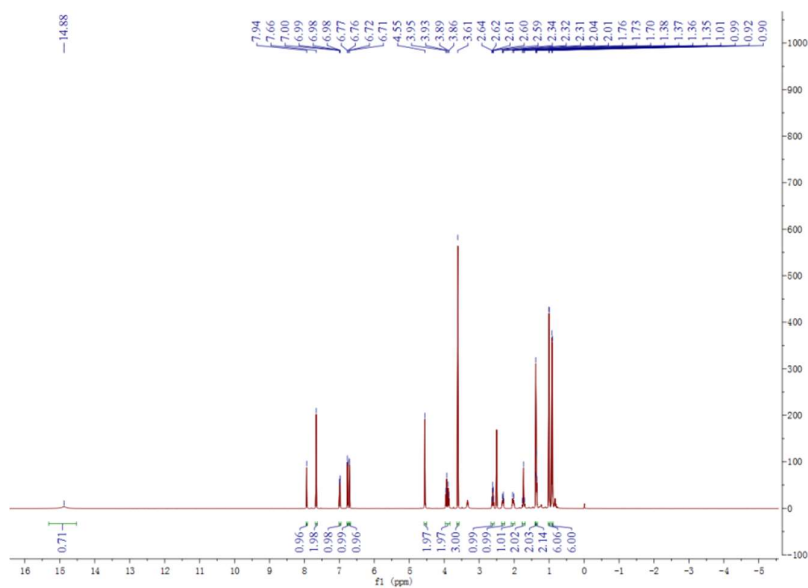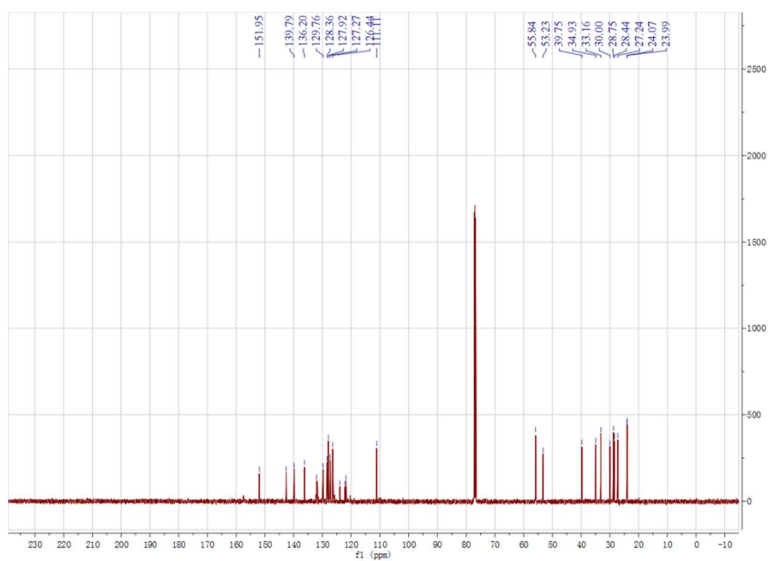

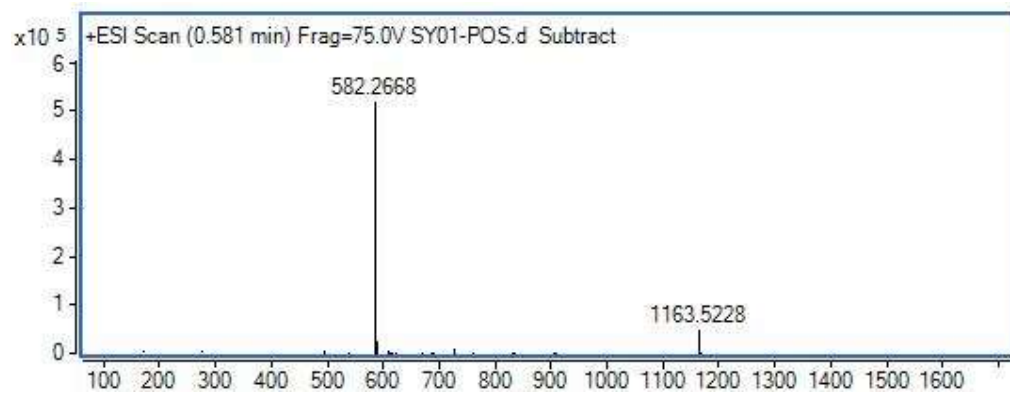

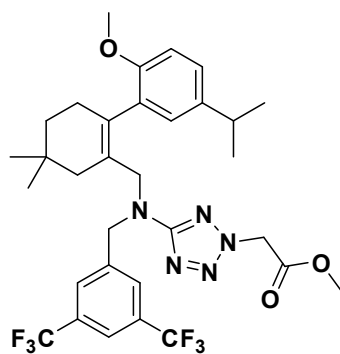

Compound 13

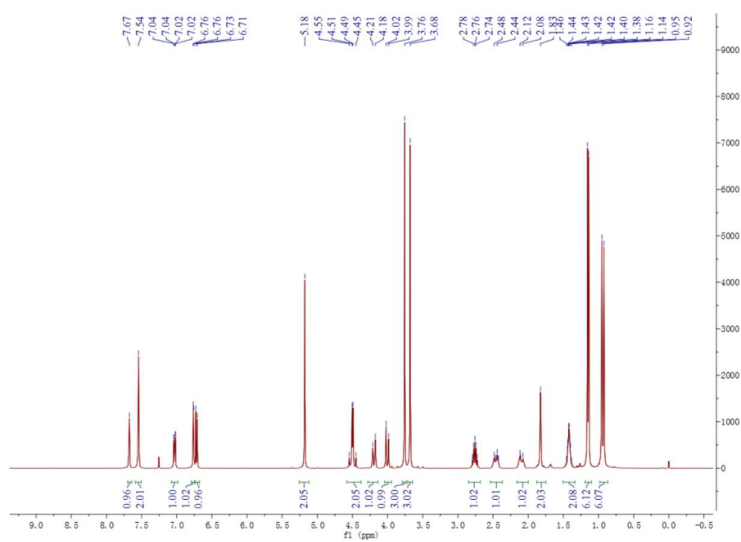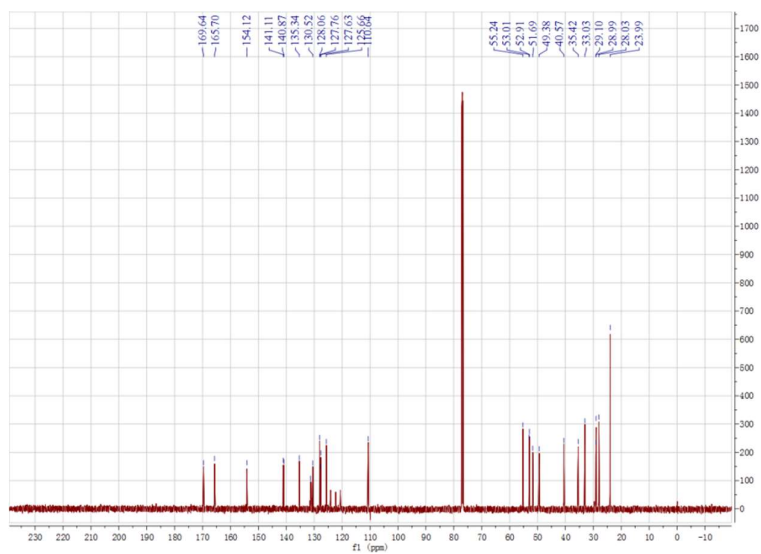

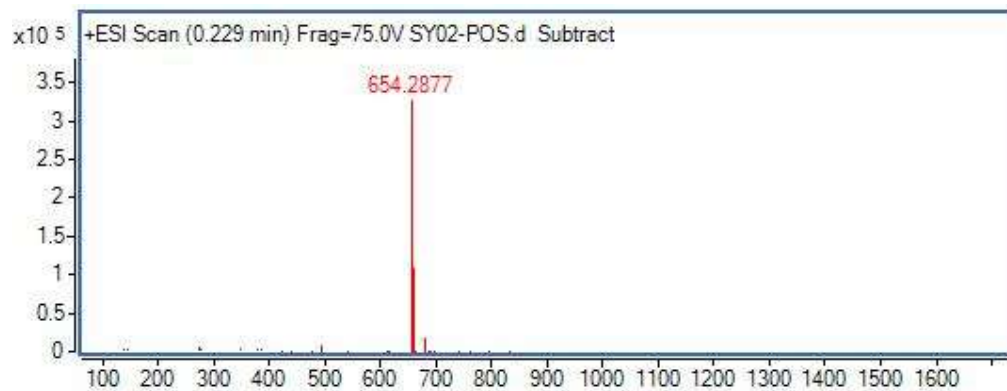

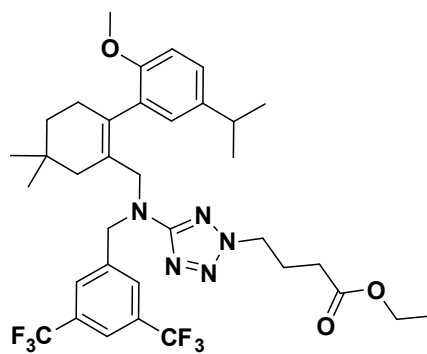

Compound 14

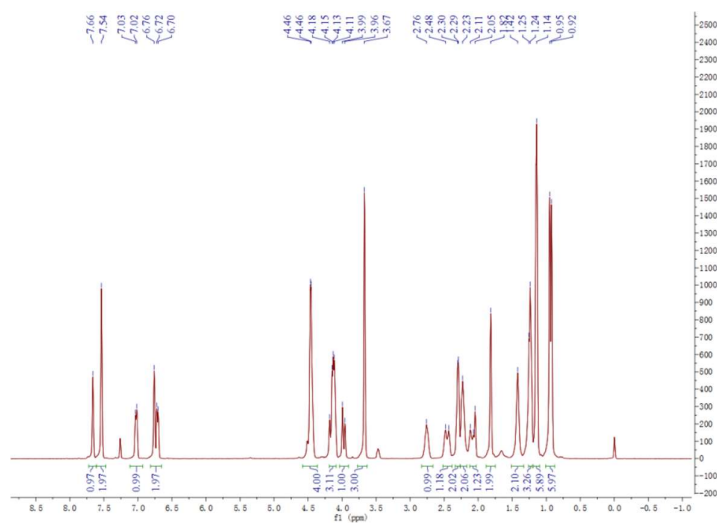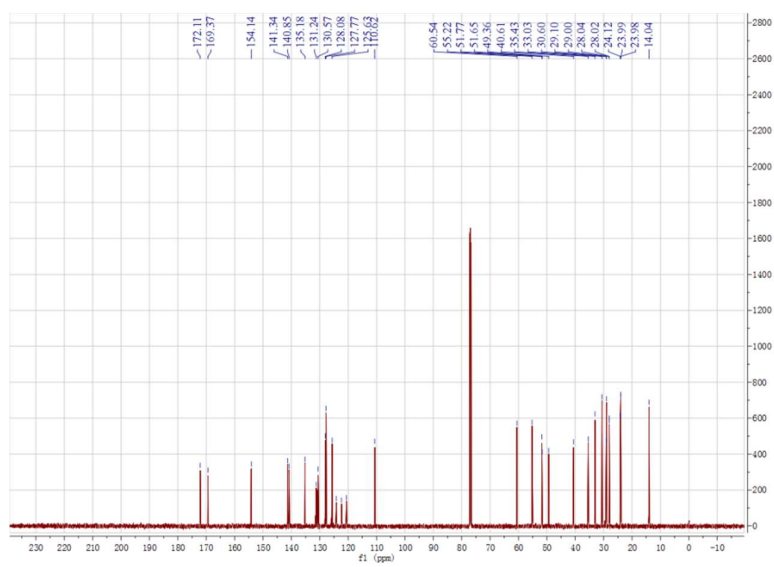

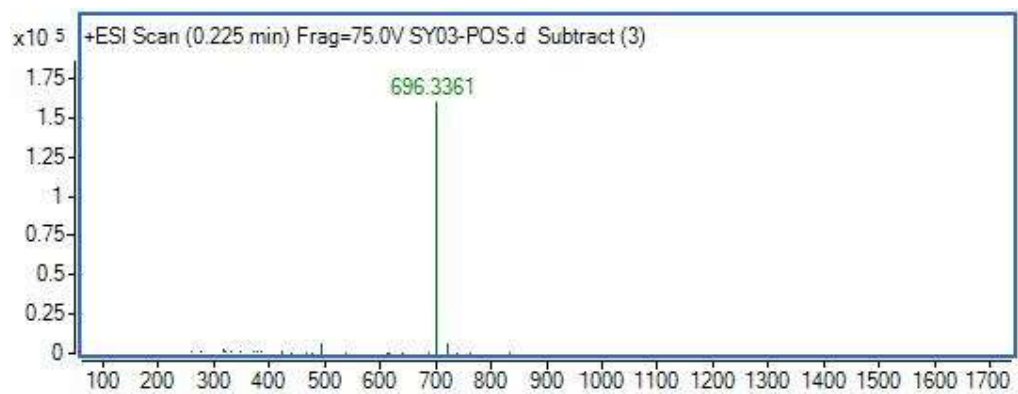

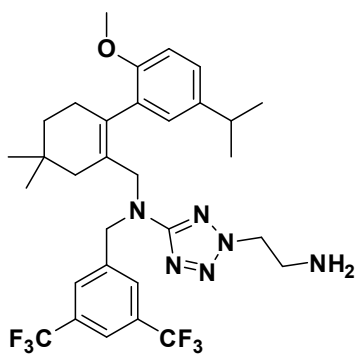

Compound 15

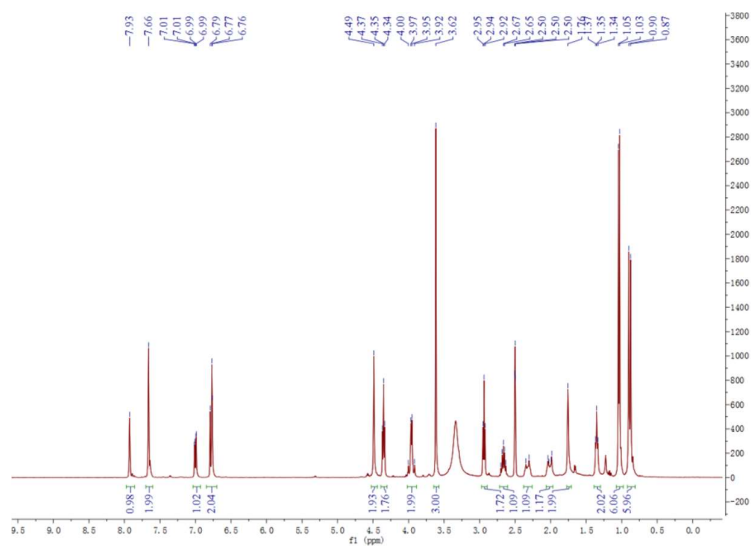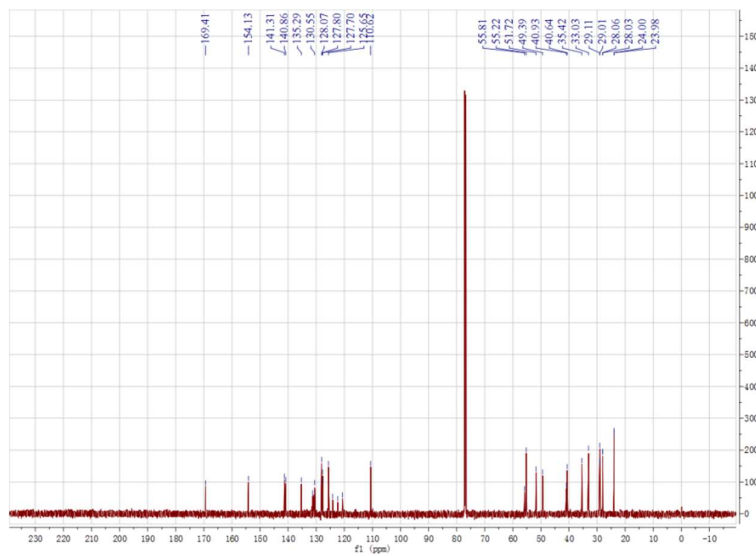



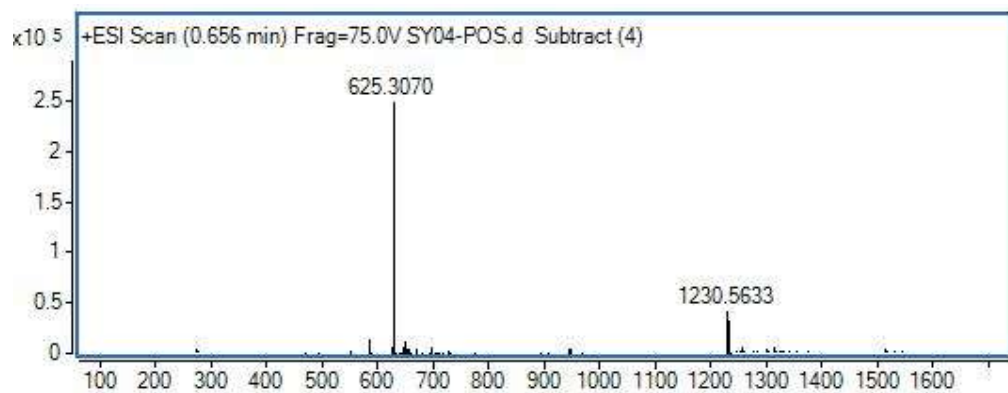

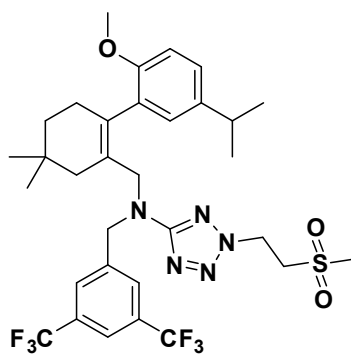

Compound 16

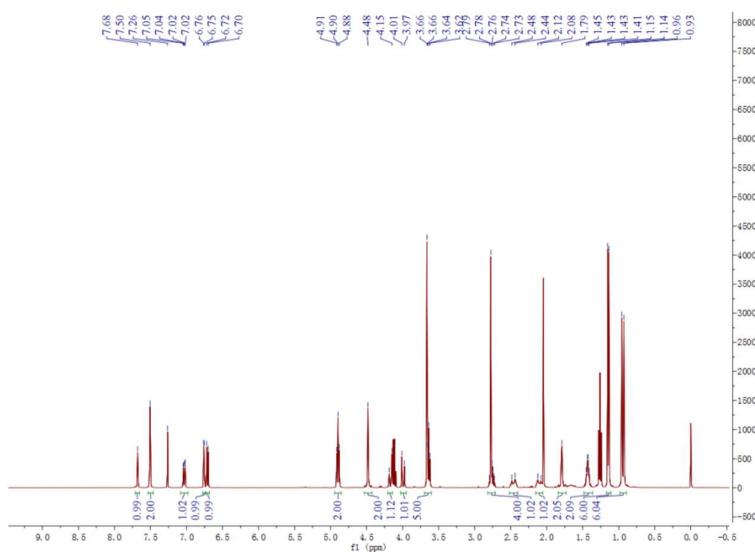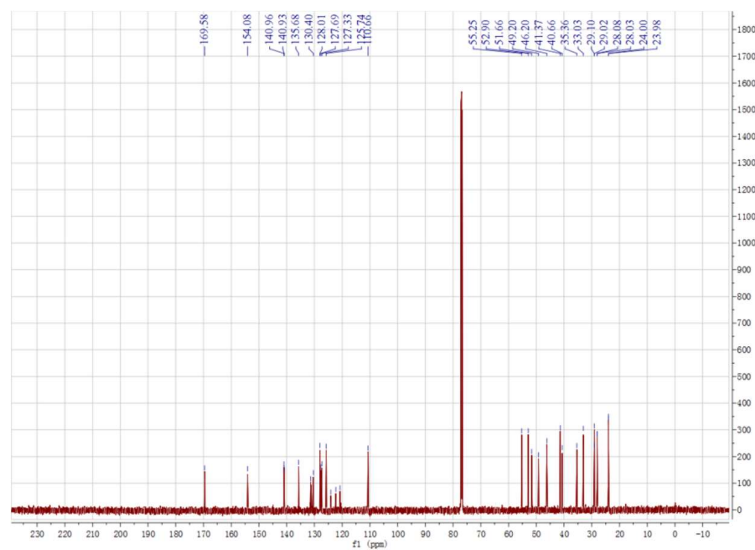

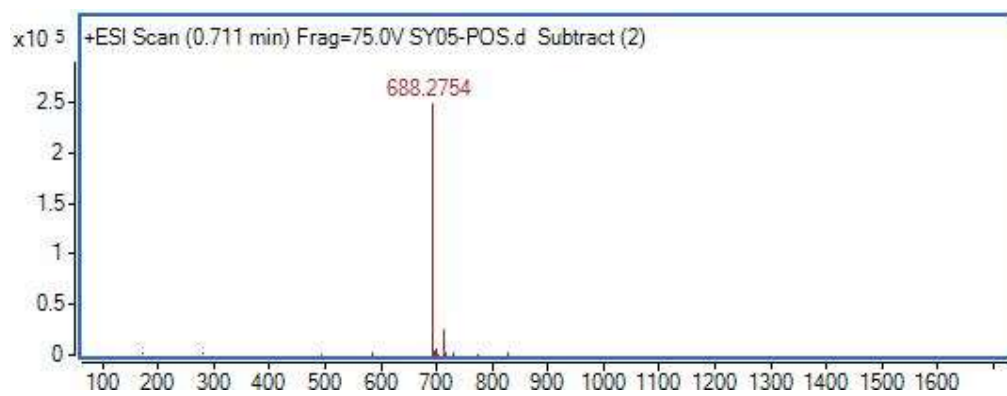

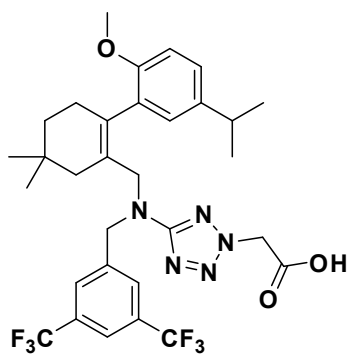

Compound 17

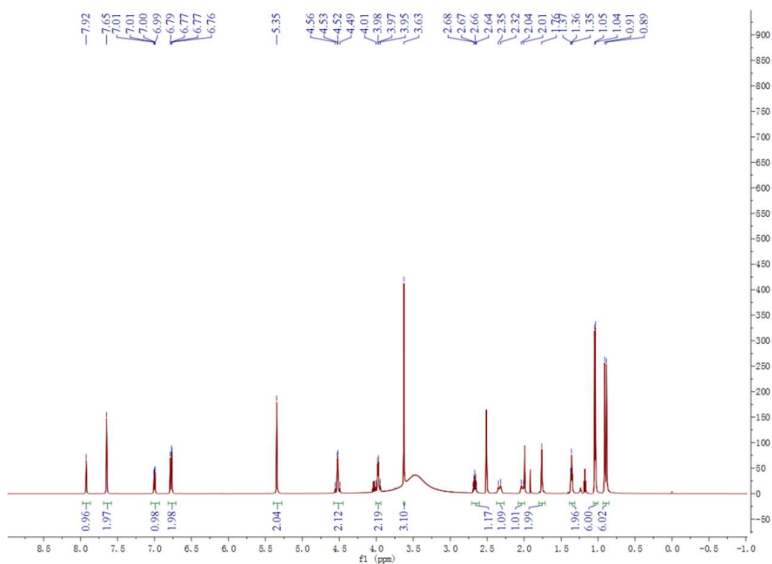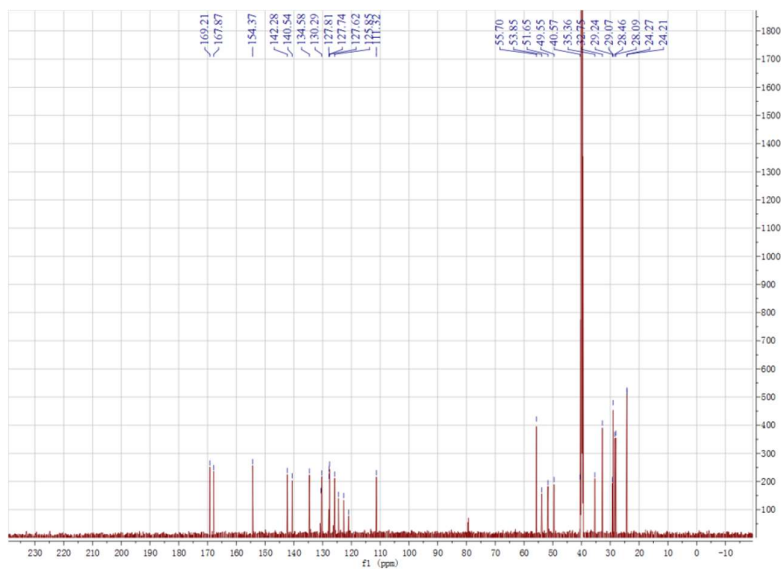

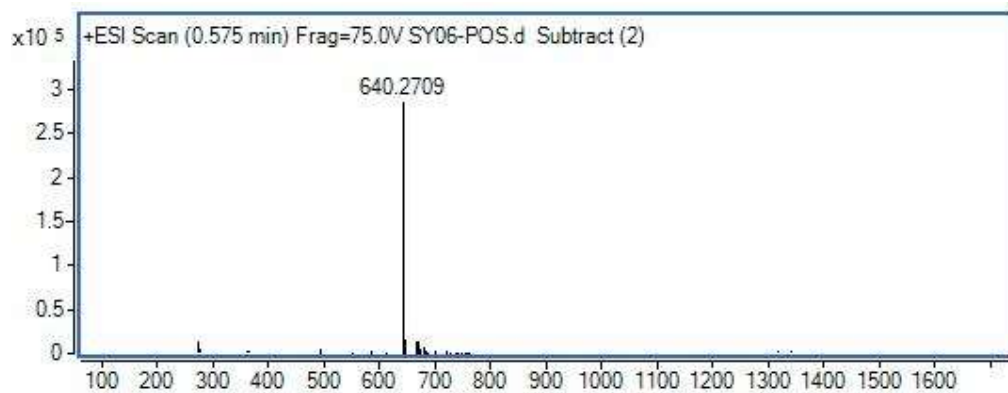

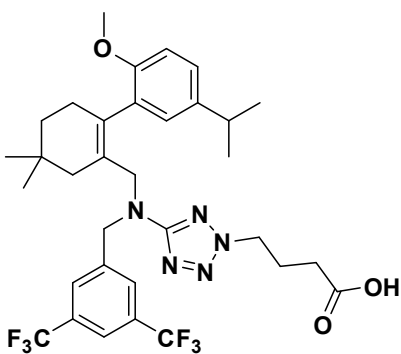

Compound 18

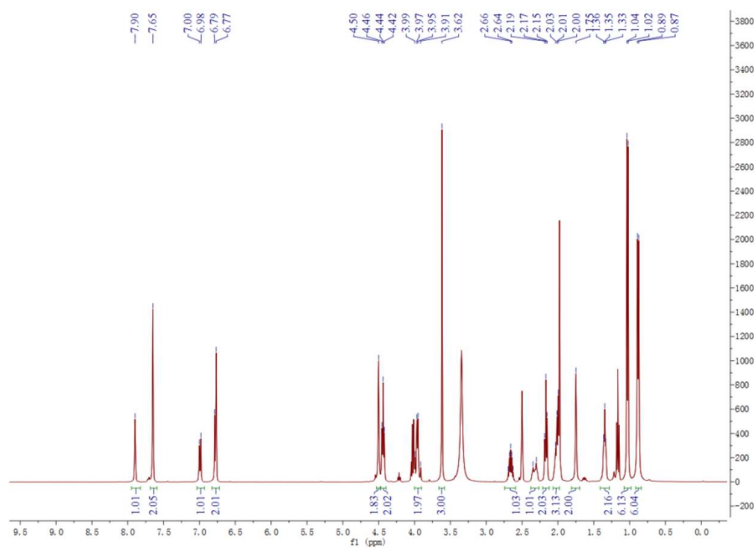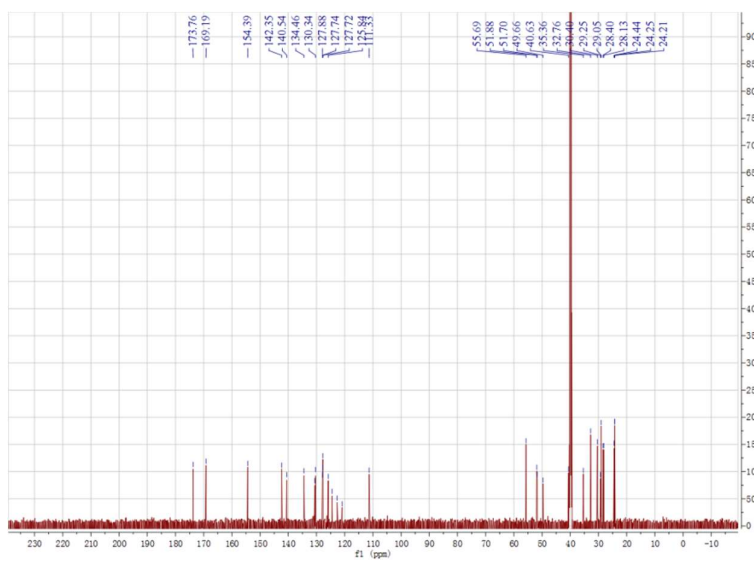

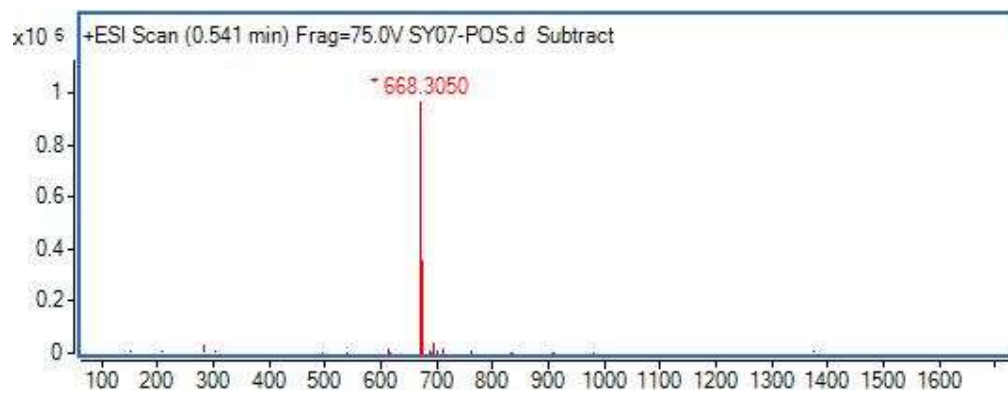

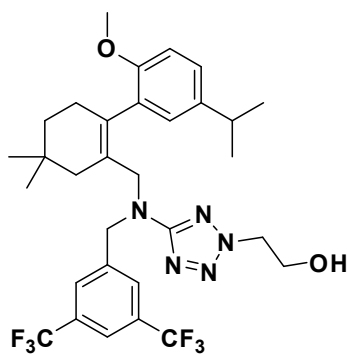

Compound 19

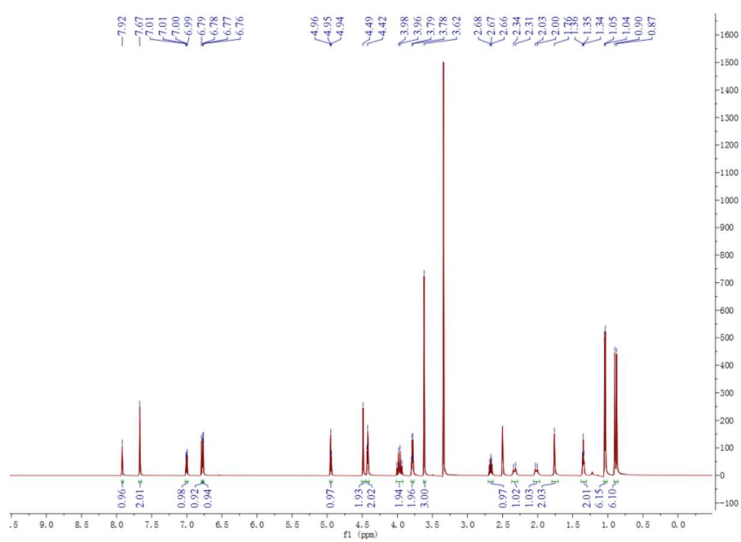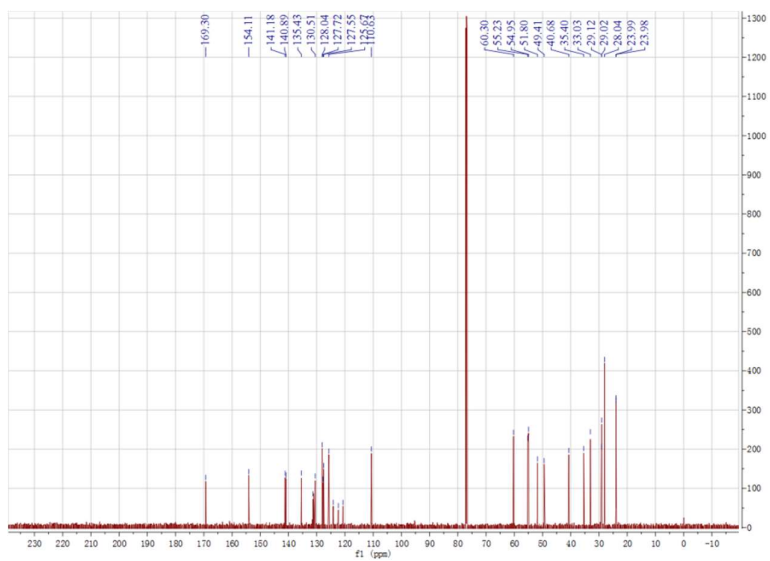



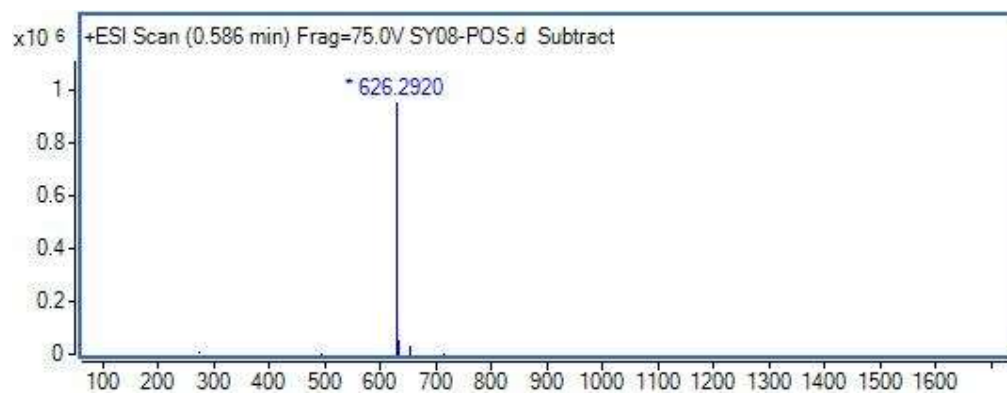

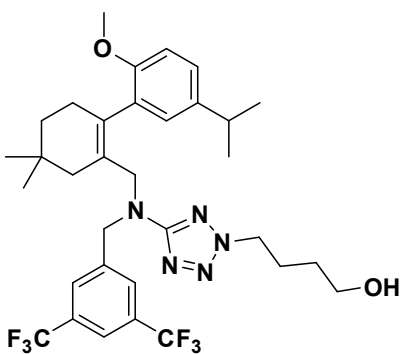

Compound 20

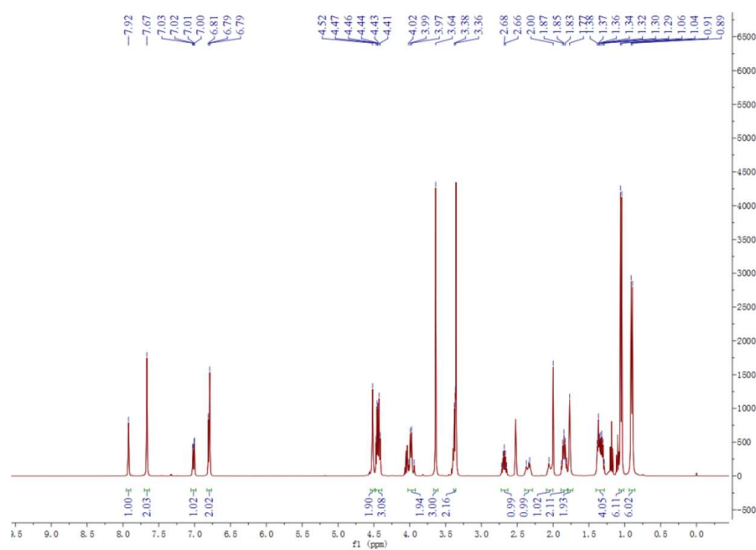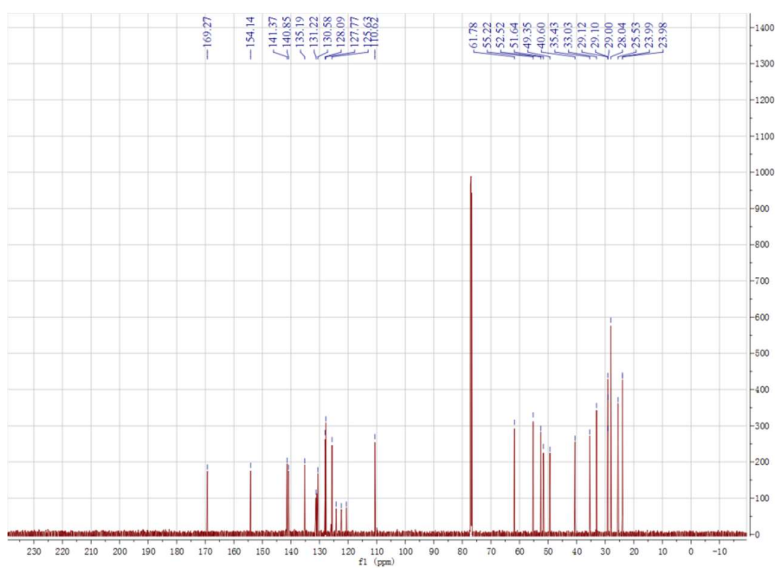

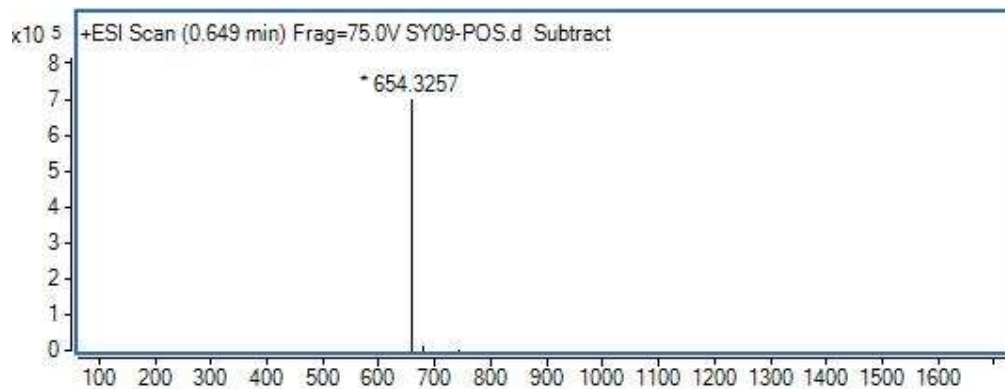

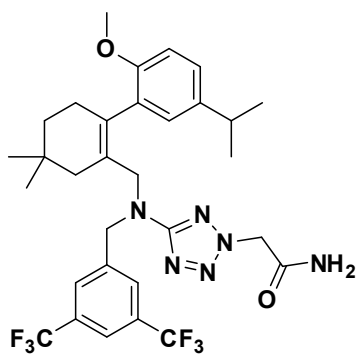

Compound 21

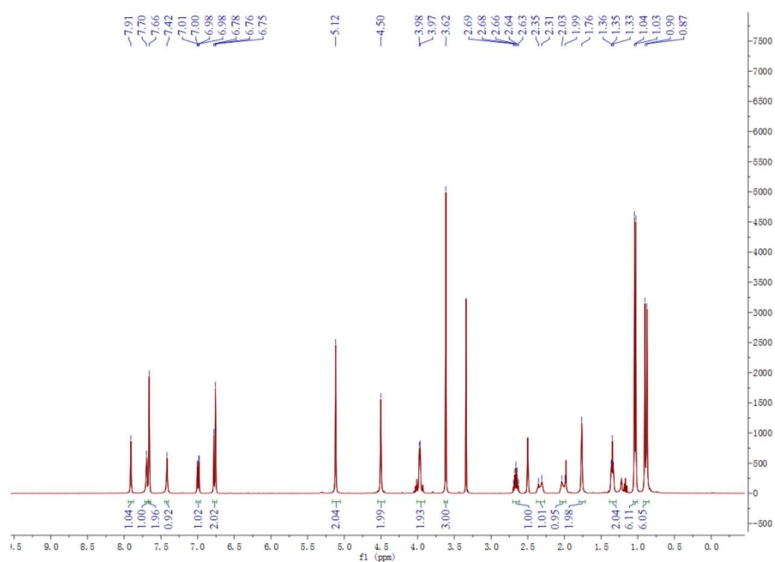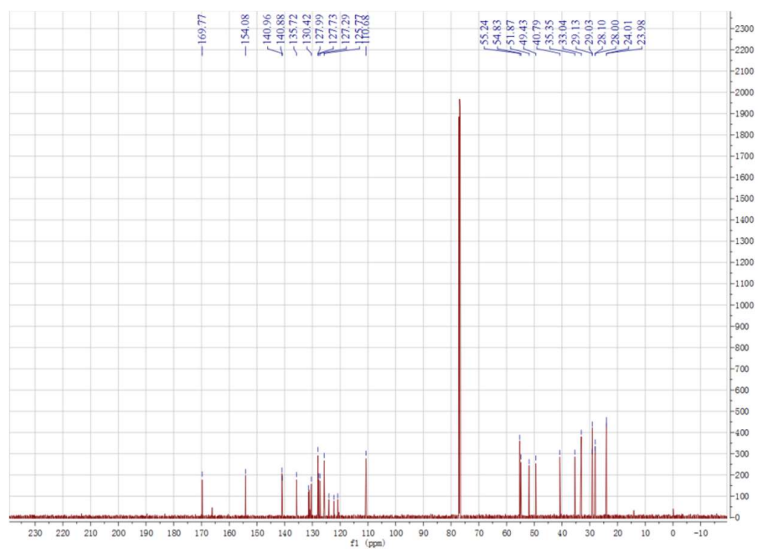

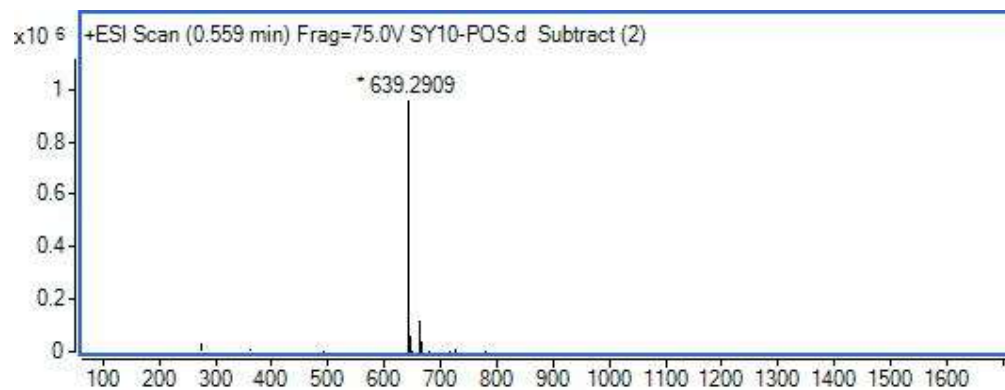

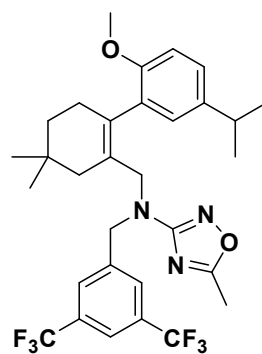

Compound 22

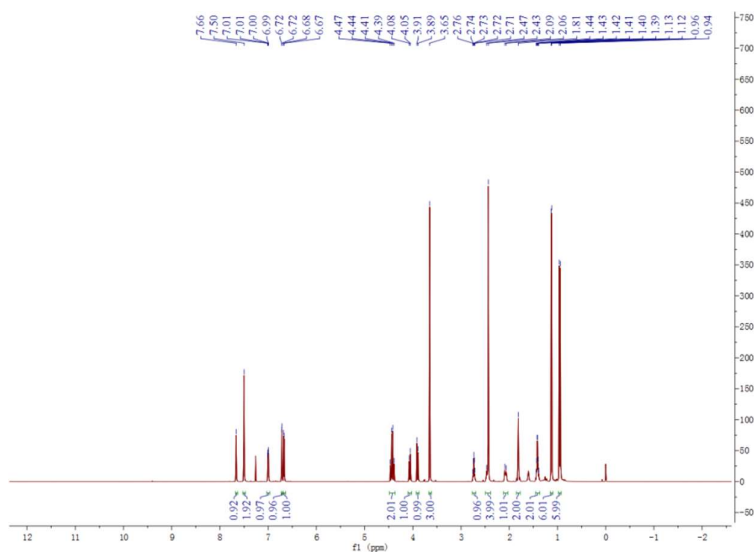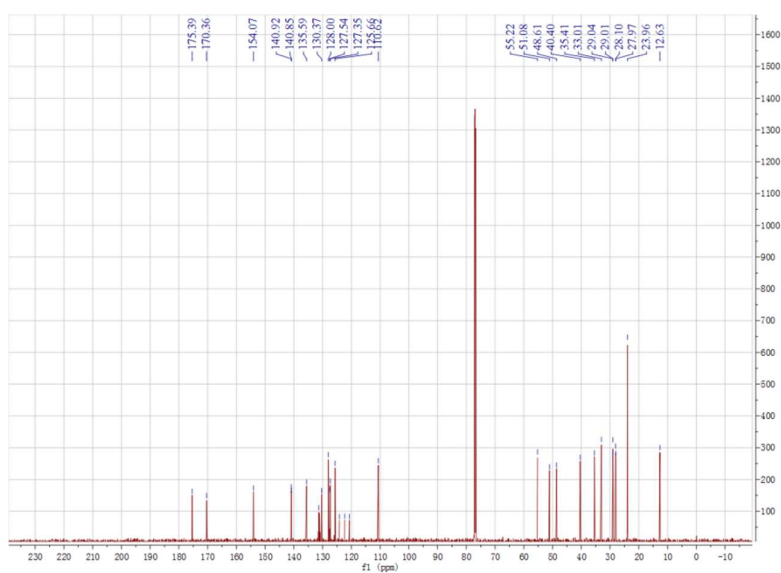

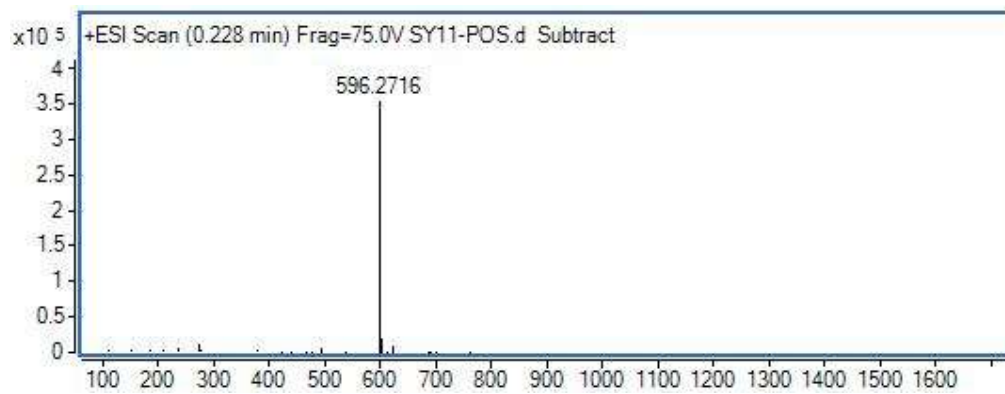

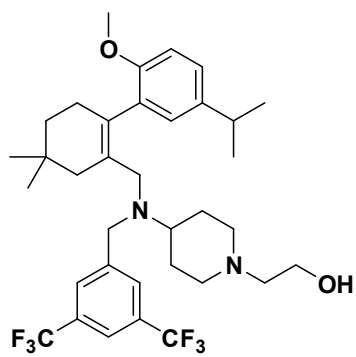

Compound 32

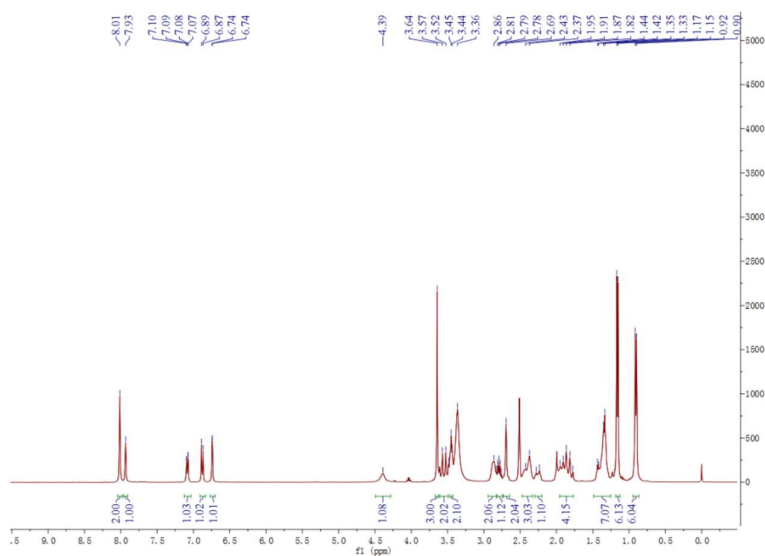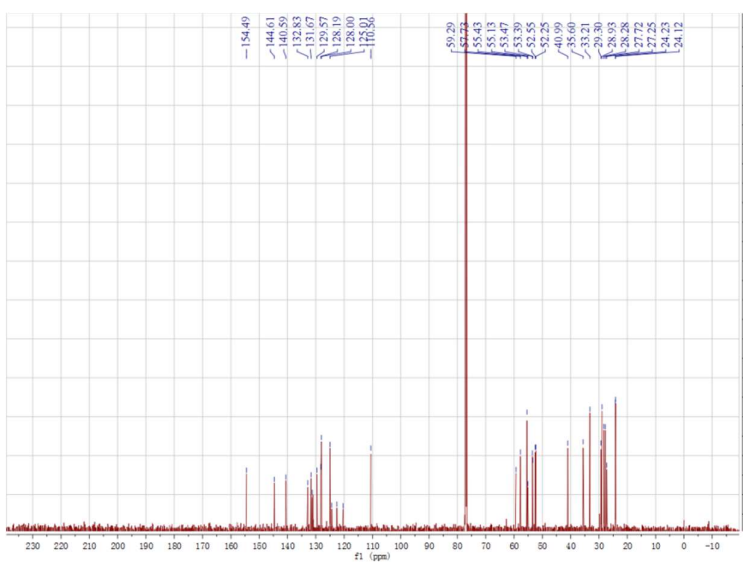



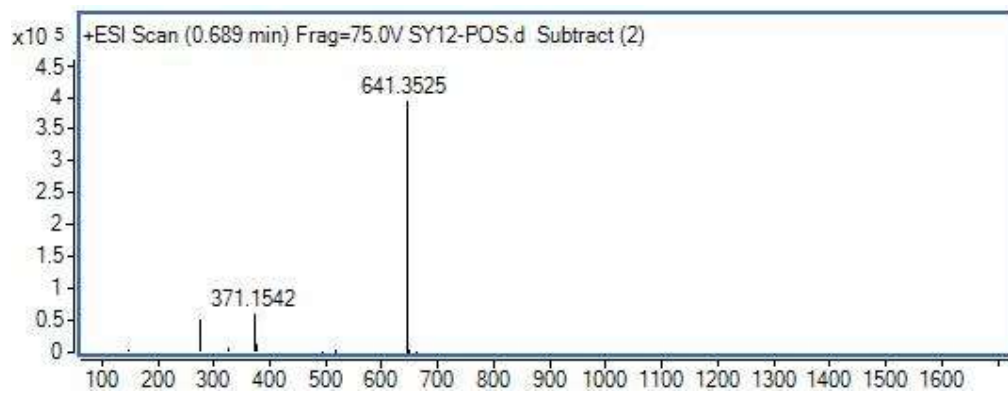

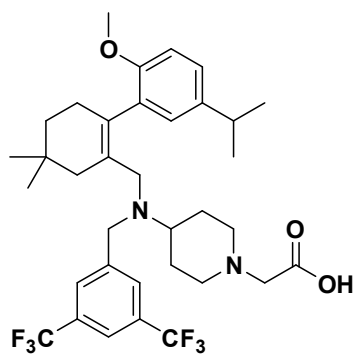

Compound 33

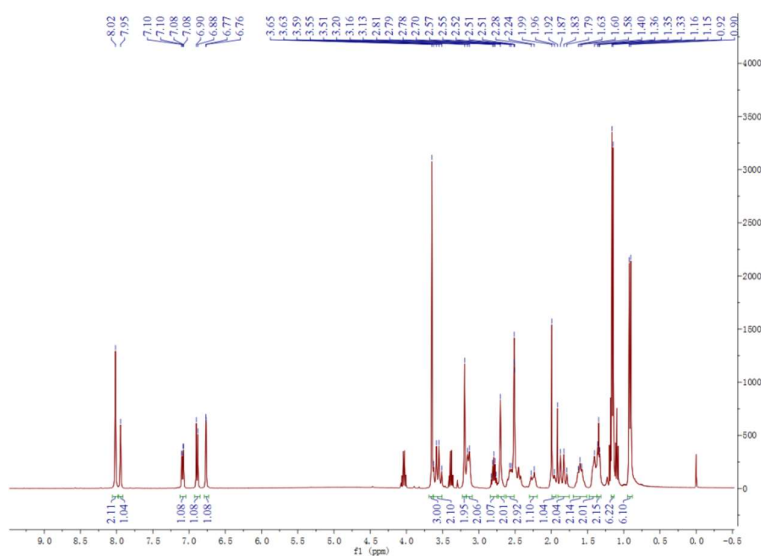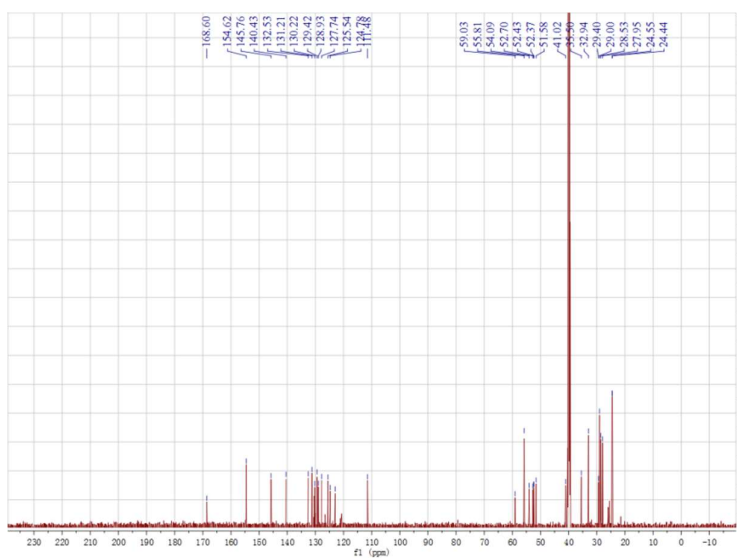

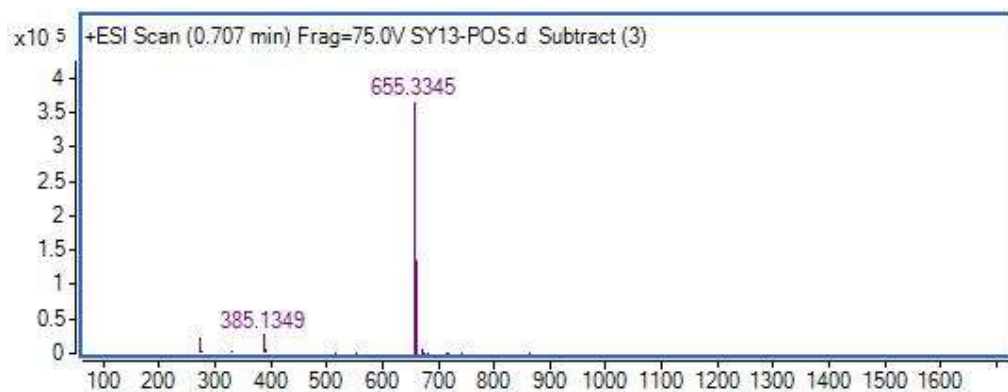

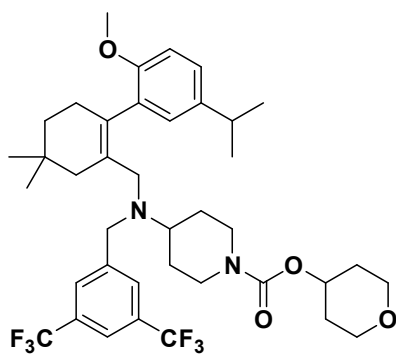

Compound 34

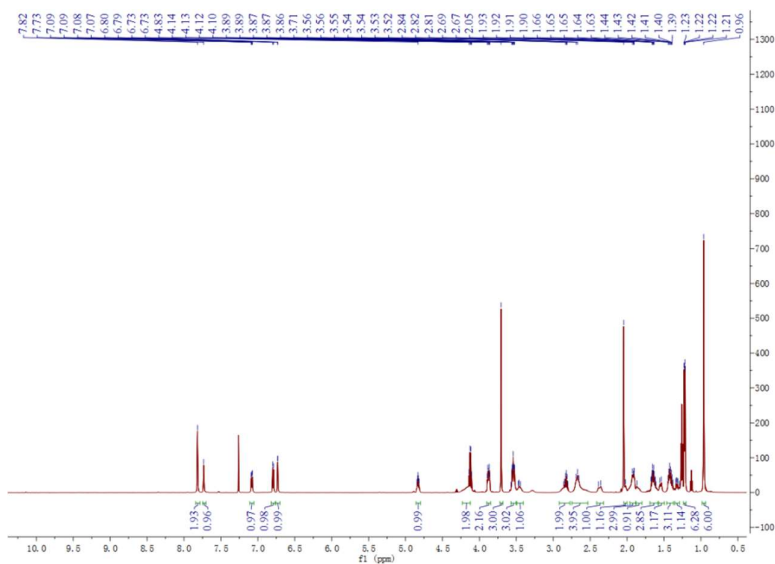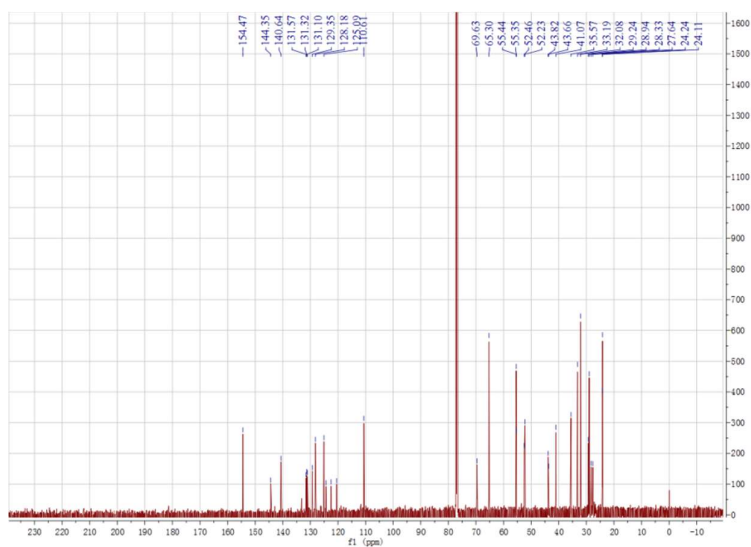

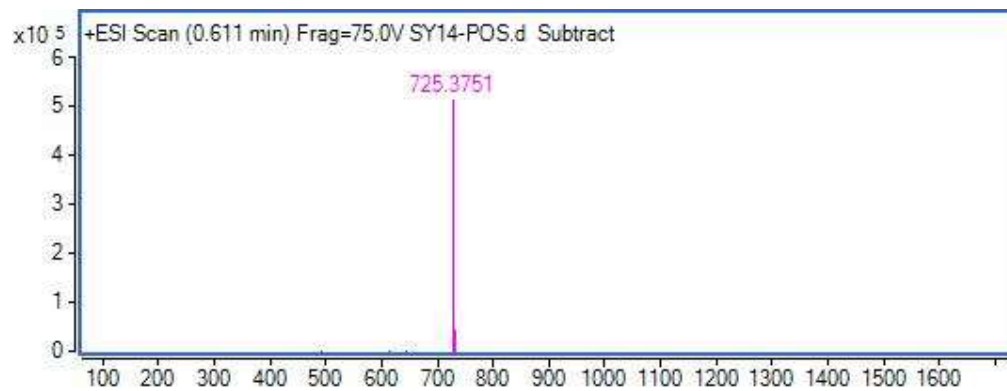

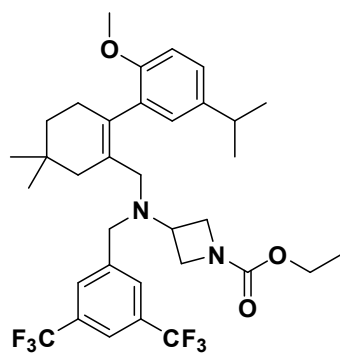

Compound 35

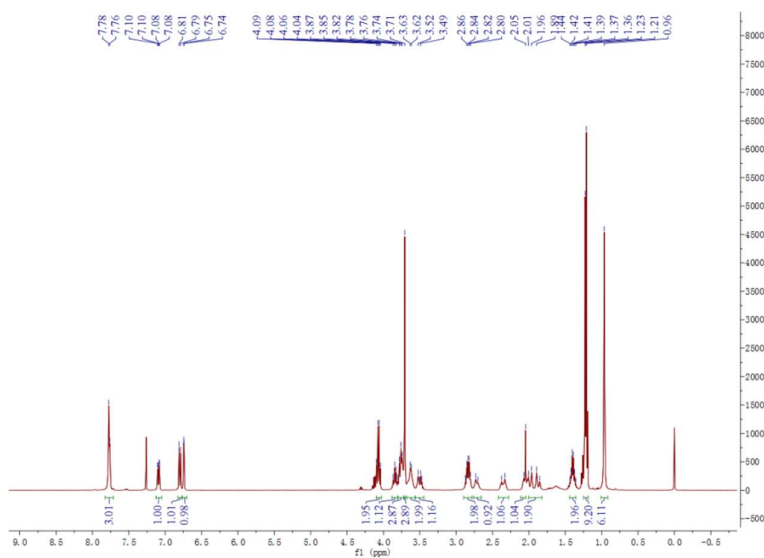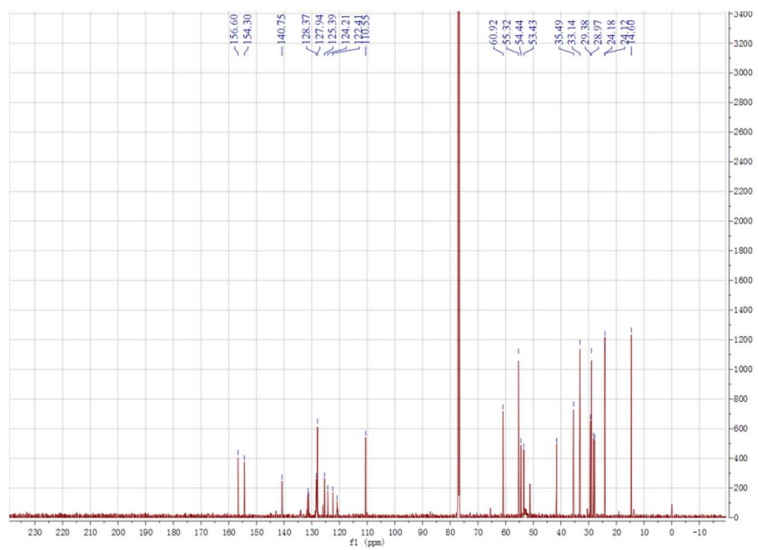

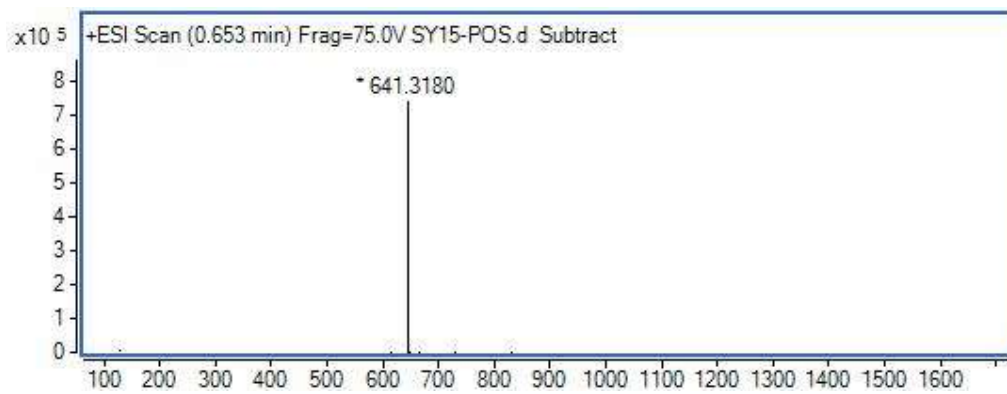

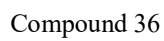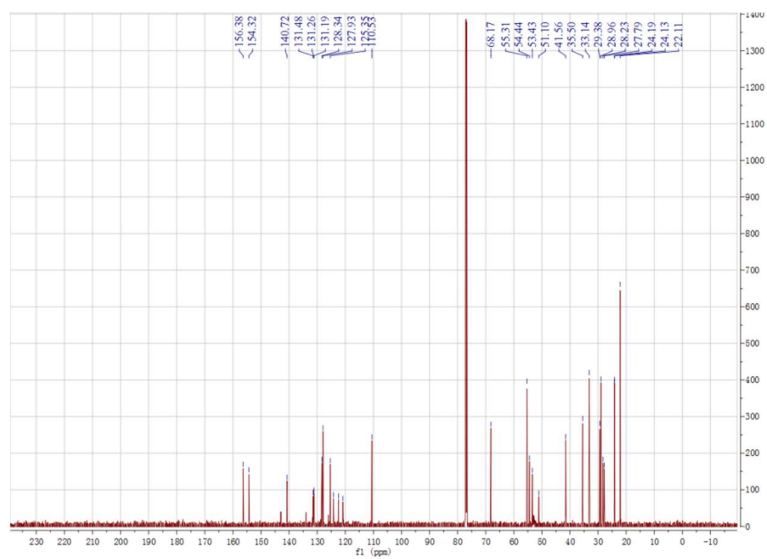



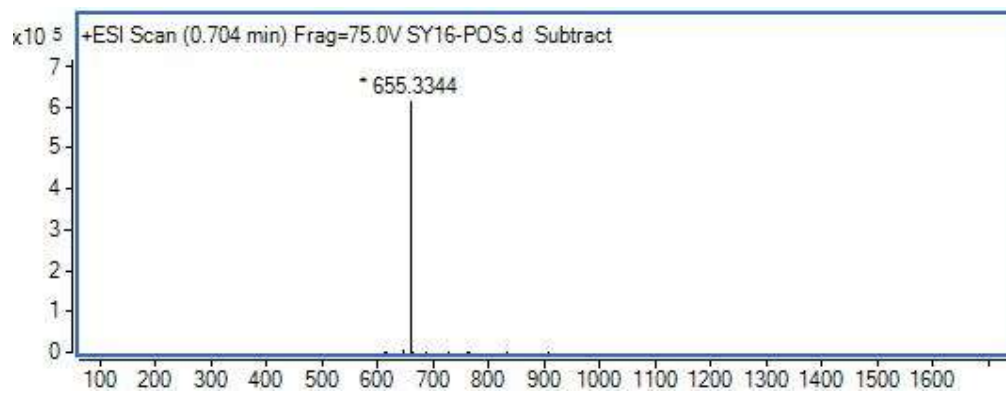

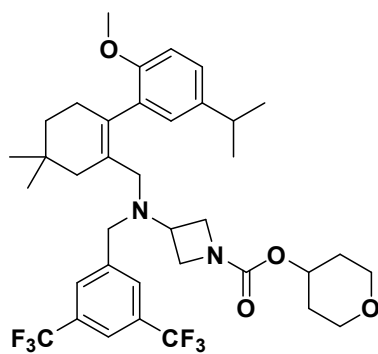

Compound 37

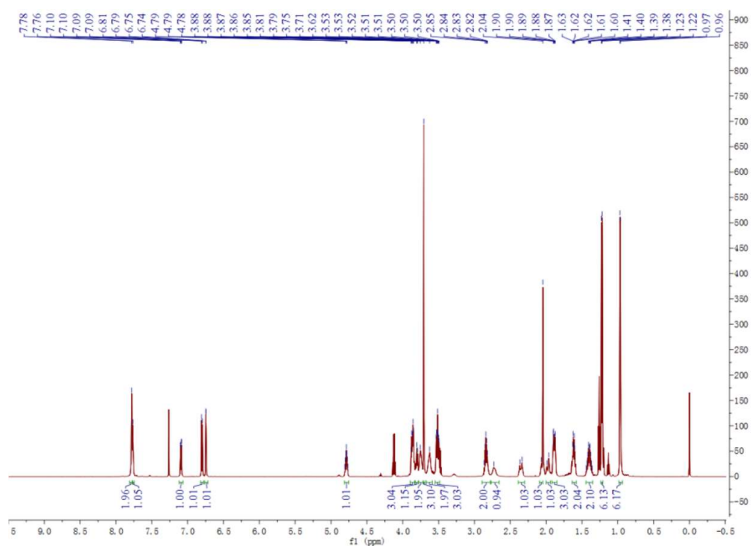

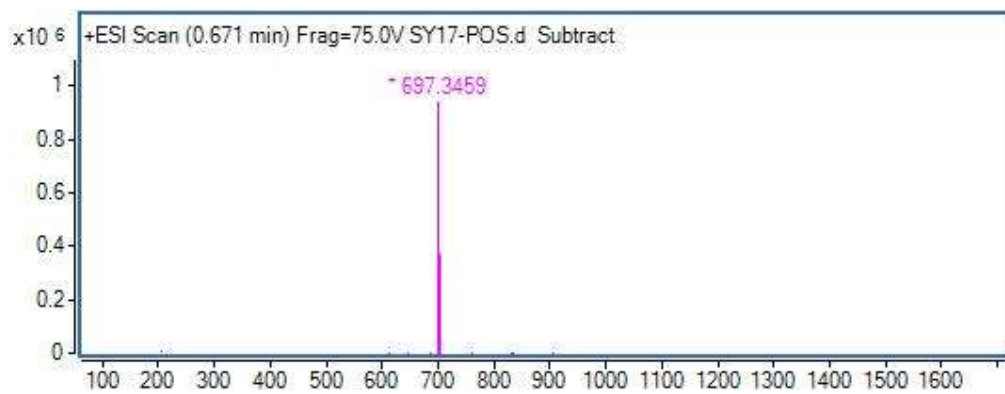

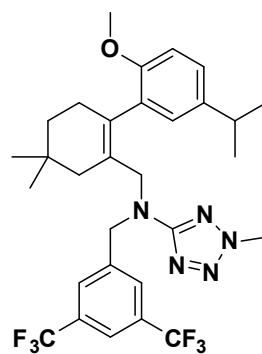

Compound 40

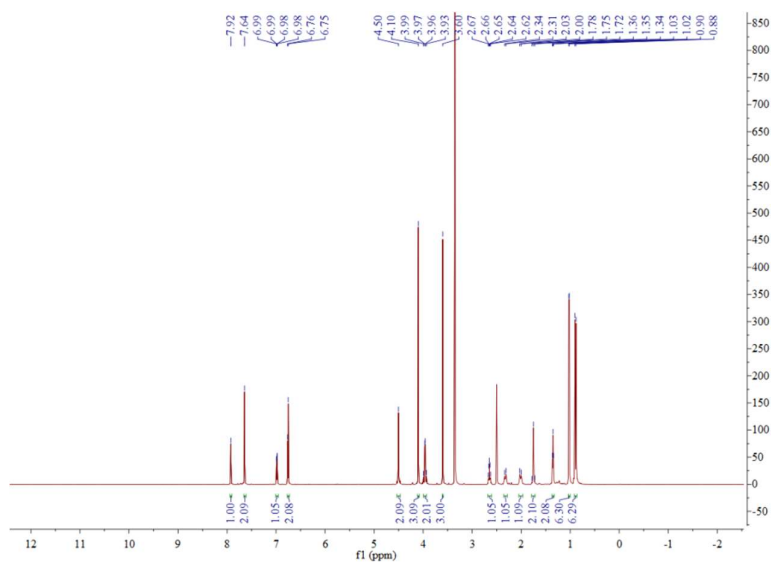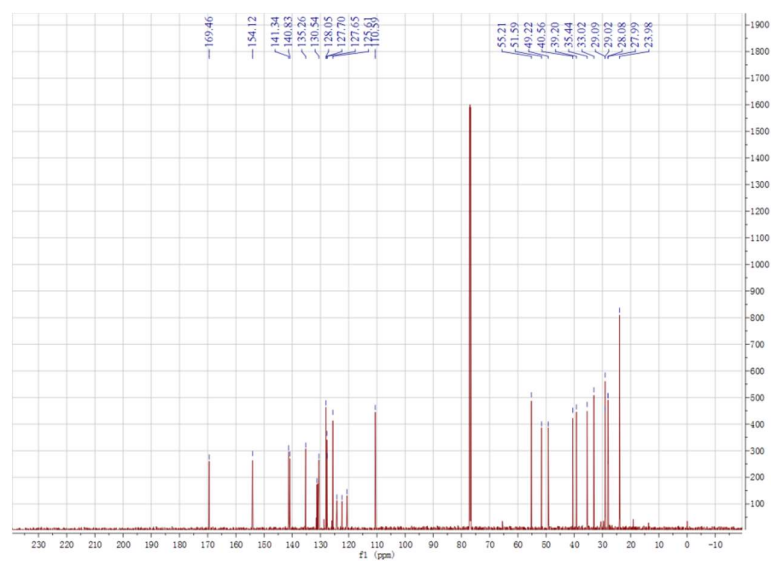

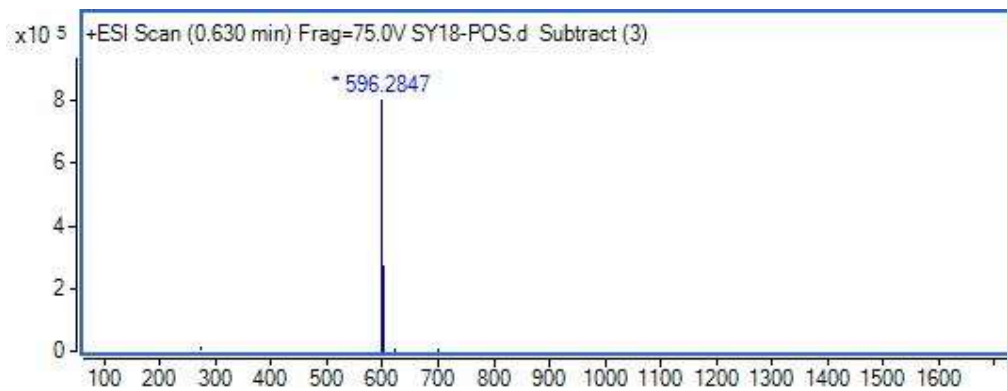

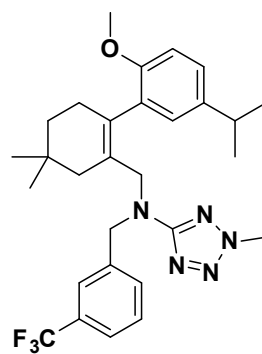

Compound 41

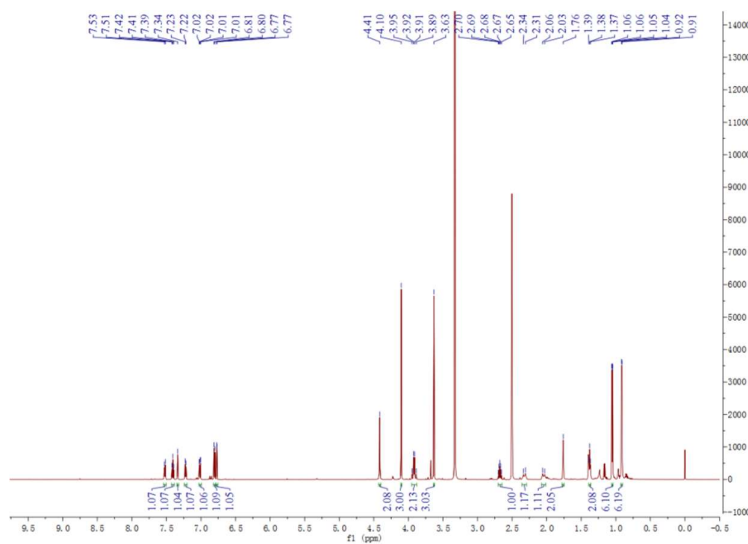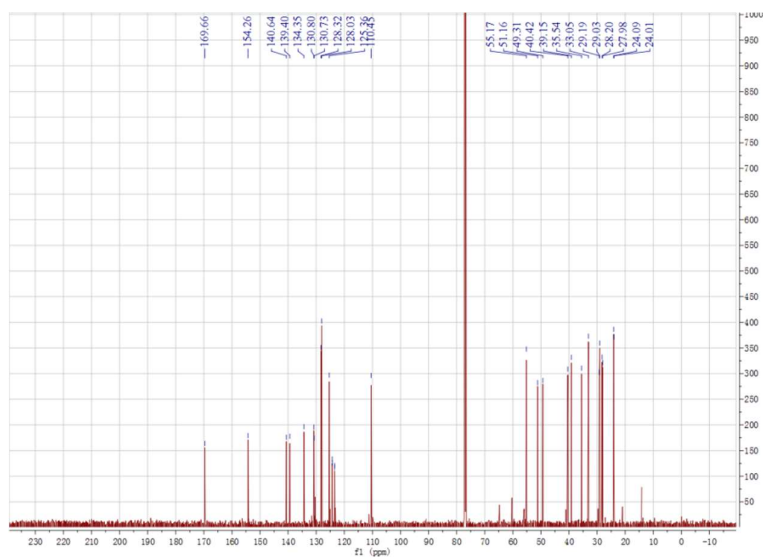

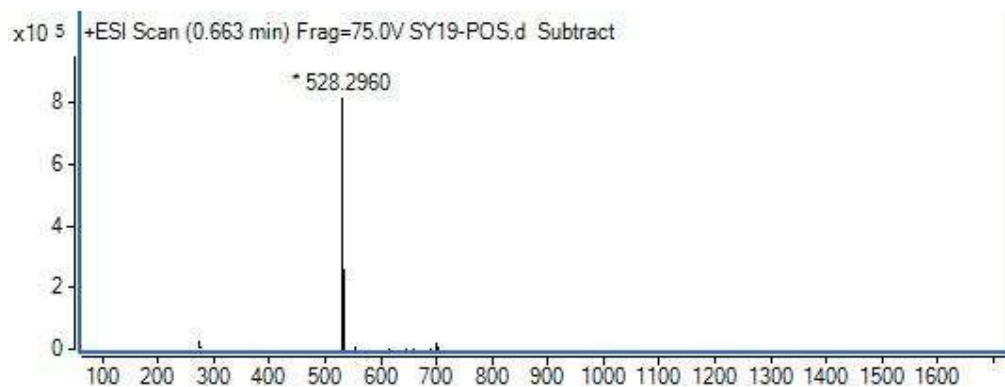

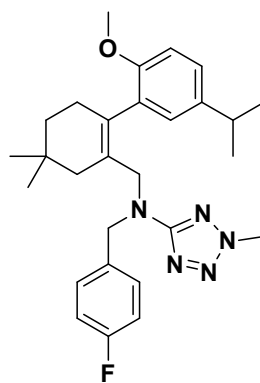

Compound 42

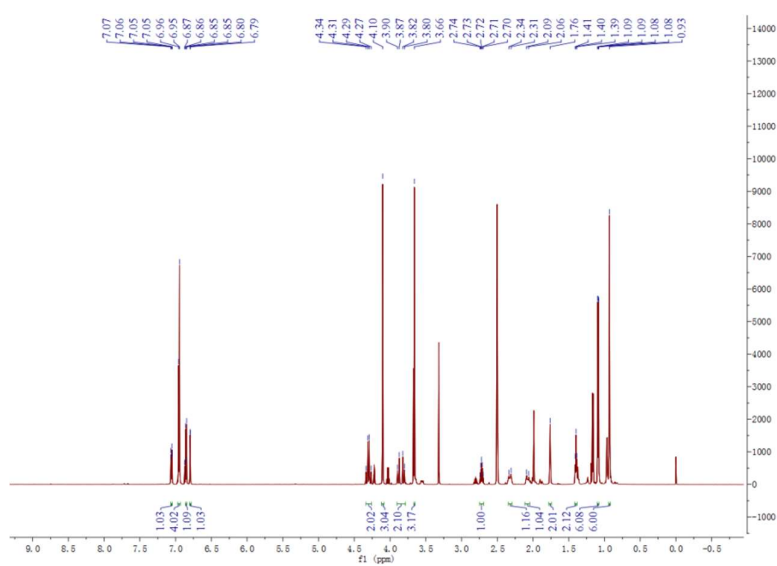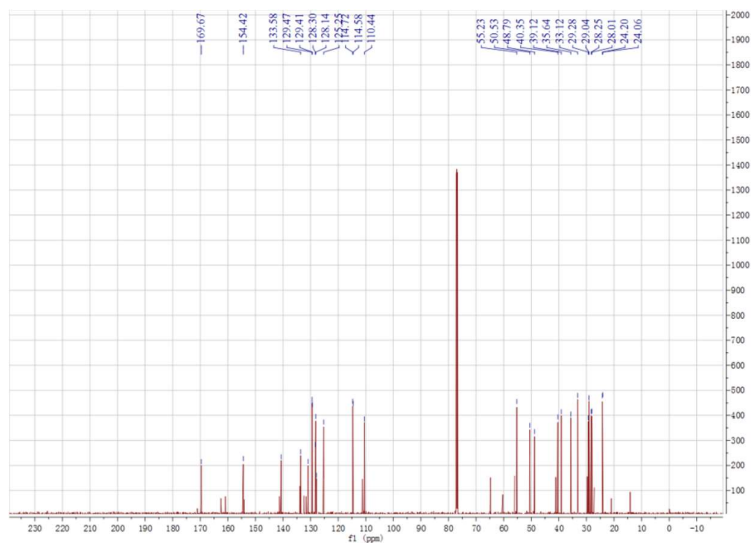



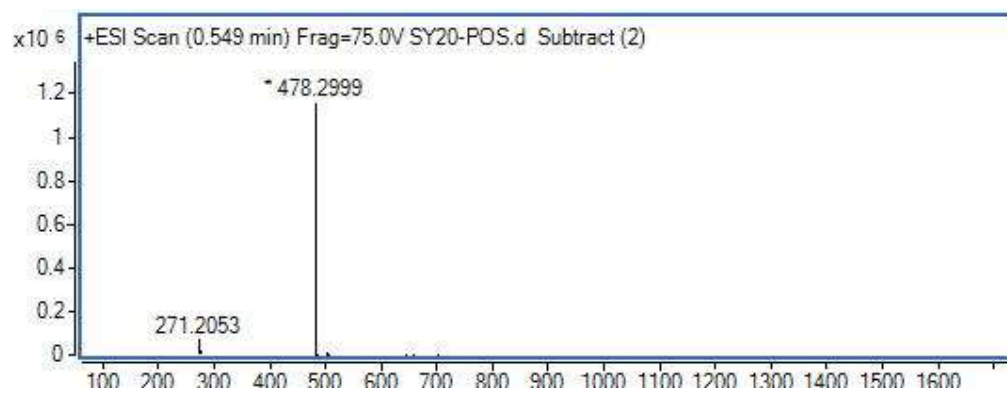

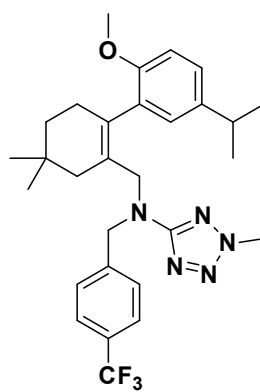

Compound 43

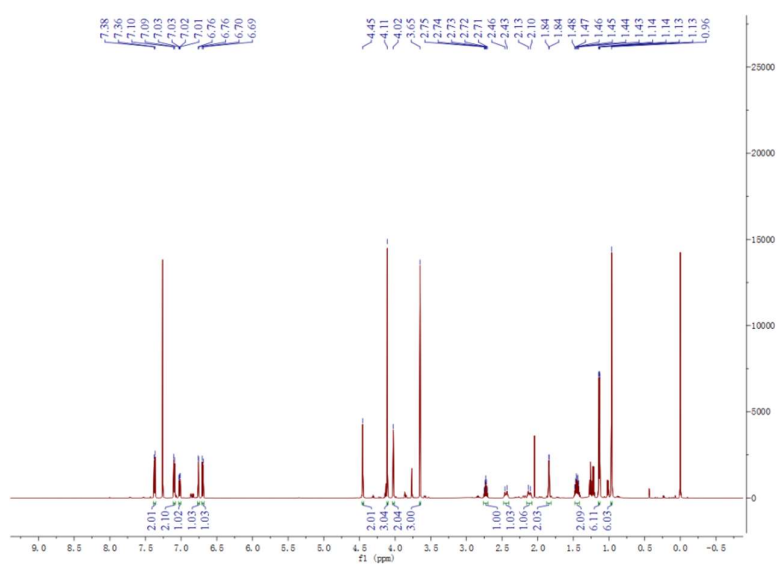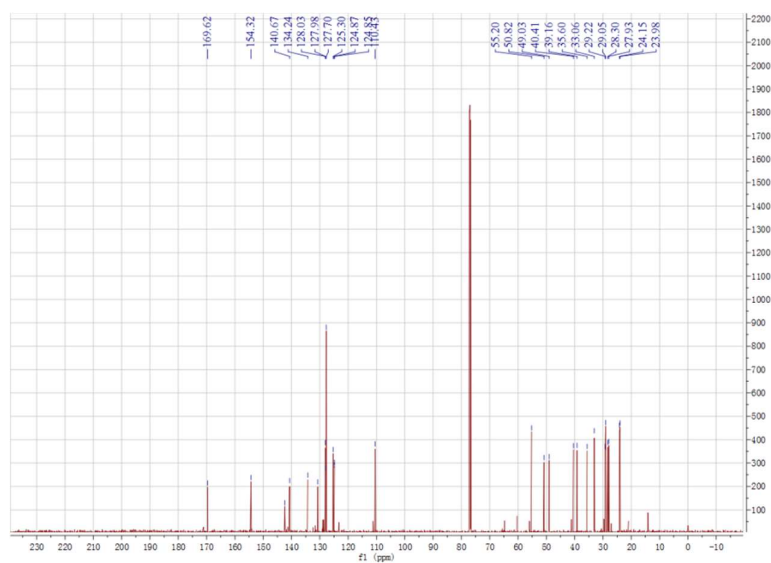

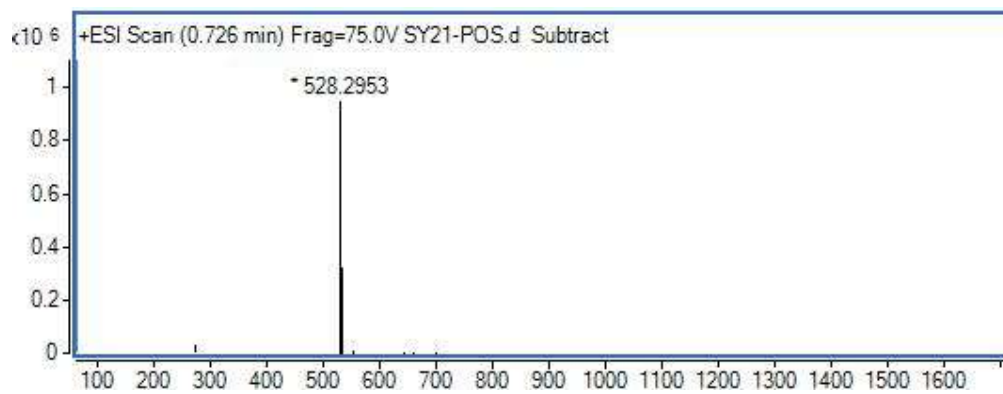

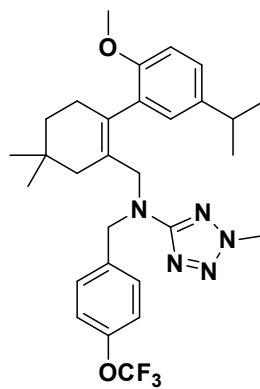

Compound 44

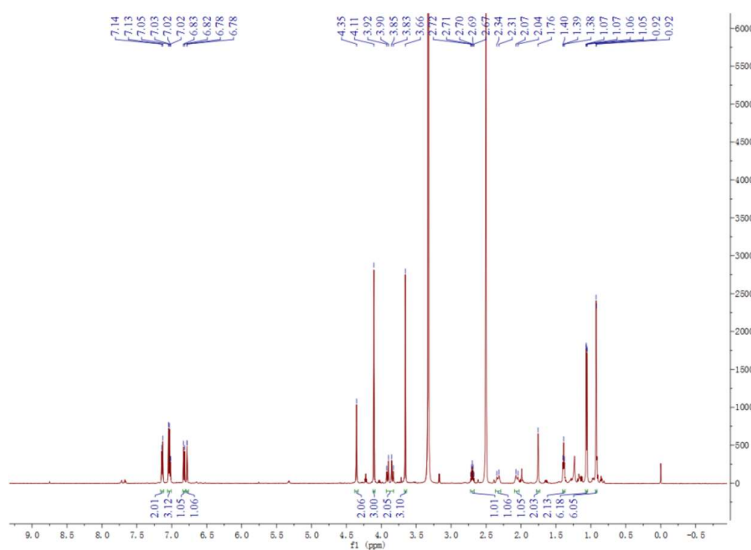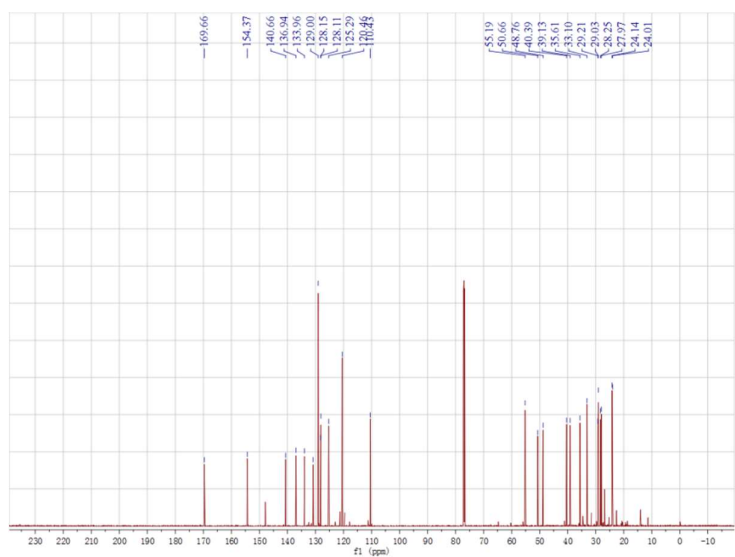

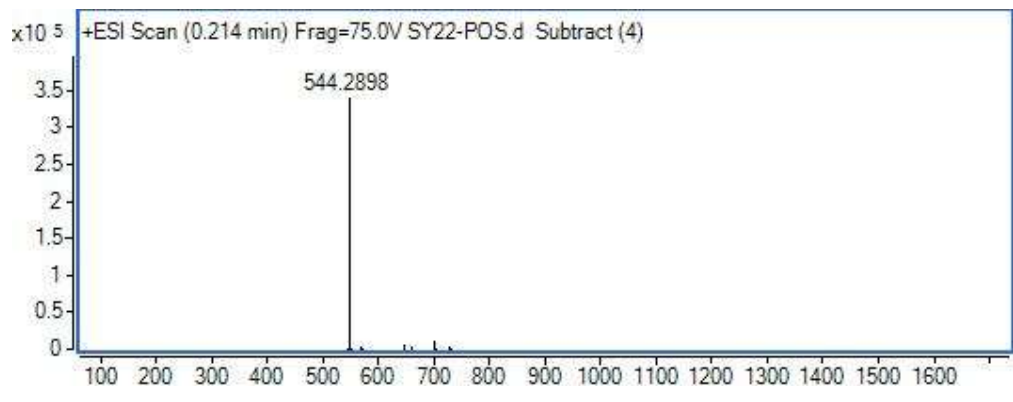

Supplement: s1 [file s1]
